# Supplementary material for: COVID-19 Vaccine Decision-making Factors in Racial and Ethnic Minority Communities in Los Angeles, California
Source: PubMed Central journal article supplement (PMC8485164; doi:10.1001/jamanetworkopen.2021.27582), 2021-09-30
Supplement: jamanetwopen-e2127582-s001.pdf [file jamanetwopen-e2127582-s001.pdf]

## Supplementary Online Content

Carson SL, Casillas A, Castellon-Lopez Y, et al. COVID-19 vaccine decision-making factors in racial and ethnic minority communities in Los Angeles, California. *JAMA Netw Open*. 2021;4(9):e2127582. doi:10.1001/jamanetworkopen.2021.27582

**eTable 1.** Focus Group Participant Demographics

**eTable 2.** Focus Group Participant Survey, Reasons for and Against Obtaining Vaccination

**This supplementary material has been provided by the authors to give readers additional information about their work.**

| <b>eTable 1. Focus Group Participant Demographics</b>                                                  |                              |                                                    |                                        |                                            |                                       |                                                |
|--------------------------------------------------------------------------------------------------------|------------------------------|----------------------------------------------------|----------------------------------------|--------------------------------------------|---------------------------------------|------------------------------------------------|
|                                                                                                        | <b>All Groups<br/>N = 70</b> | <b>Black/<br/>African<br/>American*<br/>N = 17</b> | <b>American<br/>Indian*<br/>N = 17</b> | <b>Filipino/<br/>Filipina**<br/>N = 11</b> | <b>Latino/<br/>Latina*<br/>N = 15</b> | <b>Pacific<br/>Islander**<br/>*<br/>N = 10</b> |
|                                                                                                        | No. (%)                      | No. (%)                                            | No. (%)                                | No. (%)                                    | No. (%)                               | No. (%)                                        |
| <b>Age</b>                                                                                             |                              |                                                    |                                        |                                            |                                       |                                                |
| 20-34                                                                                                  | 17 (24.29)                   | 6 (35.29)                                          | 1 (5.88)                               | 6 (54.55)                                  | 2 (13.33)                             | 2 (20.00)                                      |
| 35-49                                                                                                  | 21 (30.00)                   | 2 (11.76)                                          | 6 (35.29)                              | 5 (45.45)                                  | 6 (40.00)                             | 2 (20.00)                                      |
| 50-64                                                                                                  | 22 (31.43)                   | 4 (23.53)                                          | 9 (52.94)                              | 0 (0.00)                                   | 5 (33.33)                             | 4 (40.00)                                      |
| 65+                                                                                                    | 10 (14.29)                   | 5 (29.41)                                          | 1 (5.88)                               | 0 (0.00)                                   | 2 (13.33)                             | 2 (20.00)                                      |
| <b>Gender</b>                                                                                          |                              |                                                    |                                        |                                            |                                       |                                                |
| Female                                                                                                 | 50 (71.43)                   | 15 (88.24)                                         | 12 (70.59)                             | 5 (45.45)                                  | 10 (66.67)                            | 7 (70.00)                                      |
| Male                                                                                                   | 19 (27.14)                   | 2 (11.76)                                          | 5 (29.41)                              | 6 (54.55)                                  | 5 (33.33)                             | 2 (20.00)                                      |
| Other                                                                                                  | 1 (1.43)                     | 0 (0.00)                                           | 0 (0.00)                               | 0 (0.00)                                   | 0 (0.00)                              | 1 (10.00)                                      |
| <b>Education</b>                                                                                       |                              |                                                    |                                        |                                            |                                       |                                                |
| Some High School                                                                                       | 5 (7.14)                     | 0 (0.00)                                           | 0 (0.00)                               | 0 (0.00)                                   | 5 (33.33)                             | 0 (0.00)                                       |
| High School graduate/GED                                                                               | 5 (7.14)                     | 0 (0.00)                                           | 2 (11.76)                              | 1 (9.09)                                   | 2 (13.33)                             | 0 (0.00)                                       |
| Associate's/technical degree                                                                           | 17 (24.29)                   | 3 (17.65)                                          | 5 (29.41)                              | 3 (27.27)                                  | 5 (33.33)                             | 1 (10.00)                                      |
| Bachelor's degree                                                                                      | 19 (27.14)                   | 6 (35.29)                                          | 6 (35.29)                              | 3 (27.27)                                  | 2 (13.33)                             | 2 (20.00)                                      |
| Graduate degree                                                                                        | 22 (31.43)                   | 8 (47.06)                                          | 4 (23.53)                              | 4 (36.36)                                  | 1 (6.67)                              | 5 (50.00)                                      |
| Prefer not to answer                                                                                   | 2 (2.86)                     | 0 (0.00)                                           | 0 (0.00)                               | 0 (0.00)                                   | 0 (0.00)                              | 2 (20.00)                                      |
| <b>Number of People in Household, Mean (SD)</b>                                                        | 3.04 (2.17)                  | 2 (1.06)                                           | 2.06 (1.20)                            | 3.73 (1.90)                                | 3.93 (1.59)                           | 3.73 (1.90)                                    |
| <b>Employment Status</b>                                                                               |                              |                                                    |                                        |                                            |                                       |                                                |
| Full time                                                                                              | 31 (44.29)                   | 6 (35.29)                                          | 12 (70.59)                             | 4 (36.36)                                  | 2 (13.33)                             | 7 (70.00)                                      |
| Part-time                                                                                              | 18 (25.71)                   | 4 (23.53)                                          | 3 (17.65)                              | 6 (54.55)                                  | 5 (33.33)                             | 0 (0.00)                                       |
| Unemployed                                                                                             | 13 (10.00)                   | 2 (11.76)                                          | 2 (11.76)                              | 1 (9.09)                                   | 7 (46.67)                             | 1 (10.00)                                      |
| Retired                                                                                                | 8 (11.43)                    | 5 (29.41)                                          | 0 (0.00)                               | 0 (0.00)                                   | 1 (6.67)                              | 2 (20.00)                                      |
| <b>Essential Worker</b>                                                                                | 34 (48.57)                   | 8 (47.06)                                          | 9 (52.94)                              | 3 (27.27)                                  | 8 (53.33)                             | 7 (70.00)                                      |
| <b>Resides within a low-income zip code (Median household income &lt;\$40K, per U.S. Census 2010)</b>  | 39 (55.71)                   | 11 (64.71)                                         | 9 (52.94)                              | 4 (36.36)                                  | 11 (73.33)                            | 4 (40.00)                                      |
| <b>Very Important or Important for all people in community to receive the COVID-19 vaccine</b>         | 54 (77.14)                   | 7 (41.18)                                          | 13 (76.47)                             | 11 (100.00)                                | 15 (100.00)                           | 8 (80.00)                                      |
| <b>Very Likely or Moderately Likely to get an approved COVID-19 vaccine when available</b>             | 37 (52.86)                   | 4 (23.53)                                          | 8 (47.06)                              | 9 (81.81)                                  | 6 (40.00)                             | 10 (100.00)                                    |
| <b>COVID History</b>                                                                                   |                              |                                                    |                                        |                                            |                                       |                                                |
| I have previously tested positive for COVID-19, a belief I had COVID-19, or had COVID-19-like symptoms | 10 (14.29)                   | 1 (5.88)                                           | 2 (11.76)                              | 2 (18.18)                                  | 3 (33.33)                             | 2 (20.00)                                      |
| No, no symptoms of COVID-19                                                                            | 57 (81.43)                   | 16 (94.12)                                         | 13 (76.47)                             | 9 (81.82)                                  | 12 (80.00)                            | 7 (70.00)                                      |
| Unsure                                                                                                 | 3 (4.29)                     | 1 (5.88)                                           | 2 (11.76)                              | 0 (0.00)                                   | 0 (0.00)                              | 0 (0.00)                                       |

Abbreviation: GED: General Education Development.

\*3 Focus Groups: 1 >50 years of age, 1 <50 years of age, 1 mixed age

\*\*2 Focus Groups: Mixed age

\*\*\*2 Focus Groups: 1 >50 years of age, 1 <50 years of age

| <b>eTable 2. Focus Group Participant Survey, Reasons for and Against Obtaining Vaccination</b> |                              |                                                    |                                        |                                            |                                       |                                                |
|------------------------------------------------------------------------------------------------|------------------------------|----------------------------------------------------|----------------------------------------|--------------------------------------------|---------------------------------------|------------------------------------------------|
|                                                                                                | <b>All Groups<br/>N = 70</b> | <b>Black/<br/>African<br/>American*<br/>N = 17</b> | <b>American<br/>Indian*<br/>N = 17</b> | <b>Filipino/<br/>Filipina**<br/>N = 11</b> | <b>Latino/<br/>Latina*<br/>N = 15</b> | <b>Pacific<br/>Islander**<br/>*<br/>N = 10</b> |
|                                                                                                | No. (%)                      | No. (%)                                            | No. (%)                                | No. (%)                                    | No. (%)                               | No. (%)                                        |
| <b>Top reasons obtaining a COVID-19 vaccine<br/>(check all that apply)</b>                     |                              |                                                    |                                        |                                            |                                       |                                                |
| I want to keep my family safe                                                                  | 52 (74.29)                   | 8 (47.06)                                          | 10 (58.82)                             | 11<br>(100.00)                             | 14 (93.33)                            | 9 (90.00)                                      |
| I want to keep my community safe                                                               | 44 (62.86)                   | 7 (41.18)                                          | 10 (58.82)                             | 7 (63.64)                                  | 12 (80.00)                            | 8 (80.00)                                      |
| I want to keep myself safe                                                                     | 43 (61.43)                   | 7 (41.18)                                          | 9 (52.92)                              | 7 (63.64)                                  | 12 (80.00)                            | 8 (80.00)                                      |
| I want to feel safe around other people                                                        | 39 (55.71)                   | 6 (35.29)                                          | 8 (47.06)                              | 7 (63.64)                                  | 10 (66.67)                            | 8 (80.00)                                      |
| I believe life won't go back to normal until most people get a COVID-19 vaccine                | 38 (54.29)                   | 6 (35.29)                                          | 8 (47.06)                              | 7 (63.64)                                  | 11 (73.33)                            | 6 (60.00)                                      |
| I don't want to get really sick from COVID-19                                                  | 36 (51.43)                   | 6 (35.29)                                          | 6 (35.29)                              | 8 (72.73)                                  | 9 (60.00)                             | 7 (70.00)                                      |
| I have a chronic health problem, like asthma or diabetes                                       | 14 (20.00)                   | 1 (5.88)                                           | 5 (29.41)                              | 3 (27.27)                                  | 2 (13.33)                             | 3 (30.00)                                      |
| My doctor told me to get a COVID-19 vaccine                                                    | 6 (8.75)                     | 1 (5.88)                                           | 1 (5.88)                               | 1 (9.09)                                   | 3 (20.00)                             | 0 (0.00)                                       |
| Other                                                                                          | 8 (11.43)                    | 5 (29.41)                                          | 2 (11.75)                              | 0 (0.00)                                   | 0 (0.00)                              | 1 (10.00)                                      |
| N/A                                                                                            | 2 (2.86)                     | 2 (11.76)                                          | 0 (0.00)                               | 0 (0.00)                                   | 0 (0.00)                              | 0 (0.00)                                       |
| <b>Top reasons for not obtaining a COVID-19 vaccine<br/>(check all that apply)</b>             |                              |                                                    |                                        |                                            |                                       |                                                |
| I'm concerned about side effects from the vaccine                                              | 43 (61.43)                   | 12 (70.59)                                         | 10 (58.82)                             | 7 (63.64)                                  | 10 (66.67)                            | 4 (40.00)                                      |
| I don't know enough about how well a COVID-19 vaccine works                                    | 41 (58.57)                   | 15 (88.24)                                         | 9 (52.92)                              | 6 (54.55)                                  | 6 (40.00)                             | 5 (50.00)                                      |
| I don't trust that the vaccine will be safe                                                    | 31 (44.29)                   | 9 (52.94)                                          | 10 (58.82)                             | 4 (36.36)                                  | 7 (46.67)                             | 1 (10.00)                                      |
| Other                                                                                          | 14 (20.00)                   | 5 (29.41)                                          | 3 (17.65)                              | 0 (0.00)                                   | 4 (26.67)                             | 2 (20.00)                                      |
| I don't want to pay for it                                                                     | 10 (14.29)                   | 0 (0.00)                                           | 0 (0.00)                               | 5 (45.45)                                  | 4 (26.67)                             | 1 (10.00)                                      |
| I don't think vaccines work very well                                                          | 5 (7.14)                     | 2 (7.14)                                           | 0 (0.00)                               | 2 (18.18)                                  | 1 (6.67)                              | 0 (0.00)                                       |
| I'm not concerned about getting really sick from COVID-19                                      | 5 (7.14)                     | 3 (17.65)                                          | 0 (0.00)                               | 1 (9.09)                                   | 1 (6.67)                              | 0 (0.00)                                       |
| I don't believe the COVID-19 pandemic is as bad as some people say it is                       | 4 (5.71)                     | 2 (11.76)                                          | 0 (0.00)                               | 0 (0.00)                                   | 2 (13.33)                             | 0 (0.00)                                       |
| I'm allergic to vaccines.                                                                      | 3 (4.29)                     | 0 (0.00)                                           | 1 (5.88)                               | 0 (0.00)                                   | 0 (0.00)                              | 2 (20.00)                                      |
| I don't like needles                                                                           | 3 (4.29)                     | 0 (0.00)                                           | 0 (0.00)                               | 1 (9.09)                                   | 2 (13.33)                             | 0 (0.00)                                       |
| N/A                                                                                            | 4 (5.71)                     | 0 (0.00)                                           | 0 (0.00)                               | 0 (0.00)                                   | 0 (0.00)                              | 0 (0.00)                                       |

\*3 Focus Groups: 1 >50 years of age, 1 <50 years of age, 1 mixed age

\*\*2 Focus Groups: Mixed age

\*\*\*2 Focus Groups: 1 >50 years of age, 1 <50 years of age
